# Supplementary material
Source: PubMed Central journal article supplement (PMC5789905)
Supplement: pnas.1707492115.sapp.pdf [file pnas.1707492115.sapp.pdf]

1  
2  
3  
4  
5  
6  
7  
8  
9  
10  
11  
12  
13  
14  
15  
16  
17  
18  
19  
20  
21  
22  
23  
24  
25  
26

Supplementary Appendix

**Demography and mating system shape the genome-wide impact of  
purifying selection in *Arabidopsis thaliana***

Benjamin Laenen<sup>a,1</sup>, Andrew Tedder<sup>a,1</sup>, Michael D. Nowak<sup>a</sup>, Per Toräng<sup>b</sup>, Jörg  
Wunder<sup>c</sup>, Stefan Wötzel<sup>c</sup>, Kim A. Steige<sup>a,d</sup>, Yiannis Kourmpetis<sup>e,f</sup>, Thomas Odong<sup>e</sup>,  
Andreas D. Drouzas<sup>g</sup>, Marco Bink<sup>e,h</sup>, Jon Ågren<sup>b,2</sup>, George Coupland<sup>c,2</sup>, Tanja Slotte<sup>a,2</sup>

<sup>a</sup>Dept. of Ecology, Environment and Plant Sciences, Science for Life Laboratory,  
Stockholm University,

<sup>b</sup>Dept. of Ecology and Genetics, EBC, Uppsala University

<sup>c</sup>Max Planck Institute for Plant Breeding Research, Cologne

<sup>d</sup>Current address: Institute of Botany, Biozentrum, University of Cologne, 50674  
Cologne, Germany

<sup>e</sup>Biometris, Wageningen University & Research Centre, P.O. Box 16, 6700 AC  
Wageningen, The Netherlands

<sup>f</sup>Current address: Nestlé Institute of Health Sciences, EPFL Campus, 1015 Lausanne,  
Switzerland

<sup>g</sup>School of Biology, Aristotle University of Thessaloniki

<sup>h</sup>Current address: Hendrix Genetics Research, Technology & Services B.V., P.O. Box  
114, 5830 AC Boxmeer, The Netherlands

<sup>1</sup>B.L. and A.T. contributed equally to this work.

<sup>2</sup>Authors for correspondence, email: Jon Ågren: jon.agren@ebc.uu.se; George  
Coupland: coupland@mpipz.mpg.de, Tanja Slotte: Tanja.Slotte@su.se

## 27 **Supplementary Text**

28

## 29 **Supplementary Methods**

30

### 31 **Data and sequencing**

32 We sampled 38 *Arabis alpina* individuals throughout its European range (Table S1).  
33 DNA was extracted from leaf material using either a Qiagen DNeasy plant mini kit  
34 (Qiagen, Inc., Valencia, CA, USA) or a modified cetyl trimethyl ammonium bromide  
35 (CTAB) extraction method. Whole genome libraries with an insert size of 300-400 bp  
36 were prepared using the TruSeq DNA v2 protocol. Sequencing of 100bp paired-end  
37 reads was performed on an Illumina HiSeq 2000 instrument (Illumina, San Diego,  
38 CA, USA). The sequencing resulted in a total of 10,079 Gbp and ~245 Gbp (QC >  
39 30) per sample on average with a mean coverage of 26X ranging from 16X to 45X.  
40

### 41 **Quality assessment, trimming and genotype calling**

42 Sequencing adapters were identified using cutadapt v.1.8 (1) and trimmed from the  
43 raw sequences using Trimmomatic v.0.32 (2). Trimmed paired-end sequence reads  
44 and singleton reads whose pairs were removed in the trimming process were each  
45 mapped to the *A. alpina* V4 reference genome assembly using BWA-MEM v0.7.8 (3).  
46 Duplicated reads resulting from PCR replicates were removed using MarkDuplicates  
47 in Picard v2.0.1 (<http://broadinstitute.github.io/picard/>) and the resulting BAM  
48 alignment files were processed using the Genome Analysis Toolkit (4). Indels were  
49 realigned using GATK RealignerTargetCreator and IndelRealigner, and base quality  
50 scores were recalibrated using GATK BaseRecalibrator and PrintReads, all using  
51 default parameters. SNPs and indels were called separately with GATK  
52 UnifiedGenotyper using the DISCOVERY genotyping mode and default parameters.  
53 Genotype calling resulted in 13,410, 613 bi-allelic SNPs prior to filtering.  
54

### 55 **Filtering**

56 Using GATK's SelectVariants and VariantFiltration modules, we selected SNPs  
57 which passed the following hard filters: quality-by-depth (QD) > 2.0; mapping quality  
58 (MQ) > 40.0; strand bias (FS) < 60.0; mapping quality rank sum test (MQRankSum)  
59 > -12.5; or a rank sum test (ReadPositionRankSum) > -8.0. Any variant site  
60 containing more than two alleles was removed from the data set, along with variant  
61 sites with less than 10X and more than 100X coverage.  
62

63 With the aim of identifying problematic variant sites, we called SNPs in the *A. alpina*  
64 V4 genome assembly using the original shotgun sequence data of Willing et al. (5)  
65 using the procedures outlined above. The *A. alpina* accession sequenced by Willing et  
66 al. (5) was the result of five generations of self-fertilization with single seed descent  
67 and thus we expect there to be virtually no heterozygosity in this individual.  
68 Heterozygous sites identified in resequencing data from this individual were therefore  
69 removed from our data set. Furthermore, 20 kb windows that contained 10 or more  
70 reference heterozygous sites were removed.  
71

72 The *A. alpina* genome assembly is exceptionally enriched for repetitive elements  
73 relative to previously sequenced Brassicaceae relatives (5). To avoid inflating our  
74 variant calls with reads mapped to repetitive elements, we removed all sites that fall  
75 within regions of the genome annotated as complex or simple repeats (e.g. TEs and  
76 microsatellites). Complex repeat annotations were taken directly from Willing et al.

77 (5), but simple repeats (mono-, di-, and tri-nucleotide repeats) were annotated using  
78 RepeatMasker v.4.0.1 (6). We also plotted the cumulative distribution of the  
79 proportion of 20 kb windows annotated as repeats along the genome, and based on  
80 this we chose to remove any 20 kb window with greater than 50% repeat annotation  
81 (i.e. ~6000 windows).

82

83 Sites with fixed heterozygosity across the whole dataset, which likely represent  
84 erroneous mapping in repeat regions and thus incorrect SNP calls were removed,  
85 along with sites with more than twenty percent missing data. Only sites that were  
86 anchored to the 8 pseudo-chromosomes in the assembly were kept (234 Mb).

87

88 To avoid calling SNPs in regions of the genome that likely represent copy number  
89 variants, we calculated average coverage in 20 kb windows for each sample and  
90 removed windows with coverage higher than 165X based on the cumulative  
91 distribution per sample, removing 687 windows in total. After subsetting the dataset  
92 into regional populations (see below) we noticed that 80% of the SNPs in the highly  
93 selfing Scandinavian population showed fixed heterozygosity indicative of incorrect  
94 SNP calls, likely due to repeat variants not caught by the previous filters. We used a  
95 sliding window (5kb window size, 1 kb step length) approach per individual to design  
96 a custom filter to detect regions with higher than average coverage. Specifically, we  
97 calculated both a coverage ratio (median coverage per 5kb window divided by the  
98 genome wide median coverage) and this ratio for the upper 95% percentile coverage  
99 per window to avoid regions with very high coverage. Per window ratio was  
100 averaged across all individuals, and windows with a ratio above a fixed threshold  
101 were excluded. We tested six median coverage ratio thresholds (1.1, 1.2, 1.3, 1.4, 1.5  
102 and 2) and used 4 as a threshold for the upper 95% percentiles. In practice, thresholds  
103 of 2 and 4 for an individual with a median coverage of 30X would remove windows  
104 with a median coverage higher than 60X and windows with 5% of the sites having  
105 coverage higher than 120X. A median coverage ratio threshold of 2 and 4 as a  
106 threshold for the upper 95% percentile performed best, resulting in the removal of  
107 87% of the fixed heterozygous sites from the Scandinavian population while  
108 maintaining 72% of the total dataset. After applying all filters the dataset was  
109 composed of 1,514,615 SNPs and 43,209,020 filtered invariant sites amenable for  
110 further analysis (Table S2).

111

### 112 **Inference of population structure**

113 We used 25,505 4-fold synonymous SNPs, pruned for linkage disequilibrium (LD)  
114 using PLINK v1.9 (7), to infer the population genetic structure of our *A. alpina*  
115 samples. We performed principal component analysis (PCA) using PLINK v1.9, and  
116 Bayesian clustering analysis (Fig. 1) using both fastSTRUCTURE v1.0 (8) and TESS  
117 v3 (9). In both cases, we tested values of  $K$  ranging between 2-20, with three replicate  
118 runs per  $K$ . For fastSTRUCTURE, optimal  $K$  was chosen using a combination of the  
119 ‘chooseK’ script, and cross validation error, and for TESS v3, cross entropy scores  
120 were used to determine optimal  $K$  value. Geographic maps of ancestry coefficients  
121 were generated using POPSutilites.R ([http://membres-](http://membres-timc.imag.fr/Olivier.Francois/pops.html)  
122 [timc.imag.fr/Olivier.Francois/pops.html](http://membres-timc.imag.fr/Olivier.Francois/pops.html)) in R. v 3.2.3 (R Core Team, 2015), and  
123 individual ancestry coefficients were plotted using pophelper v1.1.6 (10) in R.

124 Pairwise  $F_{ST}$  estimates were obtained using the Weir and Cockerham (1984)  
125 estimator (11), as implemented in VCFTools 0.1.15 (12). We used 74,529 4-fold  
126 synonymous SNPs and estimated  $F_{ST}$  in 500 kb non-overlapping windows for each

127 pairwise comparison between regional populations. We report mean and 95%  
128 confidence intervals for each comparison.

129

### 130 **Runs of homozygosity and decay of linkage disequilibrium**

131 Progeny-array based outcrossing estimates have shown that populations from  
132 Scandinavia are highly selfing (up to ~10% outcrossing) whereas intermediate  
133 outcrossing rates have been estimated for two French and Spanish populations (~20%  
134 and ~18%, respectively) (13). We estimated runs of homozygosity to assess whether  
135 genomic data supported progeny-array based estimates of mating system variation.  
136 Following the recommendations of Howrigan, Simonson and Keller (14) we pruned  
137 the whole dataset for moderate linkage disequilibrium (LD) removing all SNPs within  
138 a 50 SNP window which showed an  $r^2 > 0.5$  using PLINK v1.9 (7). For each of the  
139 five regional populations we performed a search for runs of homozygosity (ROH) in  
140 100kb windows. A ROH was defined as an unbroken run of a minimum of 35  
141 homozygous SNPs. ROH were binned into length categories, small (100-200kb),  
142 medium (200kb -500kb) and large (>500kb) (Supplementary Fig. S1).

143 We used popLDdecay (<https://github.com/BGI-shenzhen/PopLDdecay>) to  
144 estimate the decay in linkage disequilibrium (LD), using all available SNPs for each  
145 regional population (Table S4). We estimated the  $r^2$  statistic using default parameters,  
146 which include a maximum distance of 300 bp between two SNPs, a minimum allele  
147 frequency of 0.005. Using 200 bp non-overlapping windows, we estimated the mean  
148 and 95% confidence interval for  $r^2$  (Supplementary Fig. S2).

149

### 150 **Summary statistics and inference of selection**

151 Each of the five regional populations defined by fastSTRUCTURE was refiltered for  
152 missing data. Per population summary statistics ( $S$ ,  $\pi$ , Tajima's  $D$ ) were calculated for  
153 4-fold degenerate sites and 0-fold degenerate sites, as described in (15). We also  
154 obtained estimates for introns and intergenic regions with low gene density and high  
155 recombination rate. These intergenic regions were selected to be less affected by  
156 linked selection, such that they would be useful for demographic inference, and had  
157 lower than the median gene density and higher than the third quartile of  
158 recombination rates. We further obtained population genetic summary statistics for  
159 total sites using global estimates and along fixed windows of 20kb (Table 1 and Table  
160 S4).

161 We used DFE-alpha v. 2.15 (16) to estimate the distribution of fitness effects  
162 (DFE) for new 0-fold degenerate nonsynonymous mutations. These analyses were  
163 based on folded 4-fold and 0-fold site frequency spectra for each population, with 4-  
164 fold degenerate synonymous sites assumed to be evolving neutrally. DFE was  
165 estimated for each population separately under a model with stepwise change in  
166 population size between two epochs as implemented as a built-in procedure in DFE-  
167 alpha, and each population's DFE was summarized in three bins representing  
168 increasing purifying selection ( $0 < N_e s < 1$ ;  $1 < N_e s < 10$ ;  $N_e s > 10$ ). Confidence intervals  
169 were generated with 200 bootstrap replicates, resampled using 10 kb windows  
170 restricted within chromosomes (Fig 2A, Table S7). Pairwise comparisons of each bin  
171 of the DFE were conducted, with FDR correction of the resulting P-values.

172

### 173 **Major effect mutations and genetic load**

174 We characterized the presence and frequency of major effect mutations in each  
175 population using snpEFF v4.2 (17). We focused on loss of start and stop codons, gain  
176 of stop codons and changes in splice sites. To avoid reference-biased inference of the

177 alternate alleles we used an outgroup to polarize SNPs. We made a whole genome  
178 alignment of *A. alpina* V4 and *A. montbretiana* (assembly ASM148412v1; 5) using  
179 LASTZ v1.02.00 (18) following Steige et al. (15). For each population, we ran  
180 snpEFF using the polarized reference and recorded fixed major effect mutation in a  
181 homozygous state within ROH. We counted the number of homozygous major effect  
182 and nonsynonymous derived homozygous genotypes as a proxy for the recessive  
183 genetic load, and the average number of derived major-effect or nonsynonymous  
184 alleles per individuals as a proxy for the additive genetic load (see e.g. (19) (Table S5).  
185 For each population we also counted the number of fixed derived nonsynonymous or  
186 major-effect alleles after removing all missing data to have a constant SNP set among  
187 populations (Table S5). In order to test if genetic load show a similar pattern at highly  
188 conserved sites, we used Phastcons scores (20) from (21). We aligned *A. alpina* V4 to  
189 *A. lyrata* (ssp. *lyrata*; PRJNA41137) to assign a phastcons score to *A. alpina* sites that  
190 were aligned. We estimated the recessive and the additive genetic load for  
191 nonsynonymous sites with a Phastcons score >0.9 representing highly conserved sites  
192 among the nine Brassicaceae species used in (21).

193

### 194 **Demographic history**

195 To estimate parameters associated with the origin of Scandinavian *A. alpina*, we  
196 inferred the parameters of three demographic models (Table S6, Fig. S5) in  
197 fastsimcoal2 v. 2.5.2.21 (22), using two-dimensional joint SFS (2D-SFS) based on a  
198 scattered sample from central Europe (13 individuals from France, Switzerland,  
199 Germany & Poland) and the Scandinavian population with the Icelandic sample (9  
200 individuals; Fig. 1A). This 2D-SFS was derived from 12,967 intergenic SNPs in  
201 regions with low gene density and high recombination rates (Fig S5).

202

203 We used 100,000 simulations to estimate log-likelihood, expected SFS, and a suite of  
204 model specific demographic parameters. To obtain global maximum likelihoods, we  
205 performed 50 independent replicate runs, with 10-40 conditional maximisation  
206 algorithm cycles and a mutation rate of  $7 \times 10^{-9}$  (23) and a generation time of 1.5  
207 years to convert estimates into units of years and individuals. We based our choice of  
208 generation time on a population survey that estimated the lifetime expectancy in *A.*  
209 *alpina* populations to between 1.4 and 2.1 years (24). Confidence intervals were  
210 generated by performing parametric bootstrapping with 100 bootstrap replicates, and  
211 50 runs per bootstrap. Model comparison was based on global maximum likelihood  
212 using the Akaike information criterion with a correction for finite sample sizes (AIC<sub>C</sub>;  
213 25) and Akaike's weight of evidence calculated using the qpcR v1.40 package in R. v  
214 3.2.3. We assessed the fit of the best model by comparing the observed SFS and  
215 Tajima's D with results from 1000 coalescent simulations in fastsimcoal2 v. 2.5.2.21  
216 (Fig S7).

217

218 We further estimated the demographic history for each regional population with  
219 StairwayPlot v0.2.beta (26) using SFSs for intergenic SNPs in regions with low gene  
220 density and high recombination rates. We report changes in effective population size  
221 ( $N_e$ ) for the best fit model (Fig S8).

222 **Forward simulations**

223 We used forward simulations to assess the impact of demography and selection  
224 associated with a shift to selfing on genetic diversity in the Scandinavian population  
225 using SLiM2 v2.1 (27). We simulated data using real exon positions on the 8  
226 chromosomes, constant mutation rates ( $7 \times 10^{-9}$  base substitutions per sites per  
227 generation; (23)) and a recombination rates map in 50kb windows derived from a  
228 RAD-seq linkage map (28) based on a cross of two French accessions. We used a  
229 distribution of fitness effects based on estimates for the Greek population (Table S7)  
230 where large effective population size and obligate outcrossing should improve the  
231 accuracy of the estimation. In order to test if the results were robust to a change in the  
232 DFE, we also simulated using the DFE for the Central European population (Fig S9).  
233 We simulated our data under two competing, two population demographic models  
234 based on the *fastsimcoal2* results. We first ran the simulation for 10,000 generation  
235 before the split, after which a shift to 90% selfing was implemented for the population  
236 representing Scandinavia. In model one, this population remained constant ( $N_e =$   
237 1000), whereas it was subjected to a ten-fold bottleneck ( $N_e = 100$ ) in model two. The  
238 Central European population had a constant population size ( $N_e = 1000$ ) in both  
239 models. Simulations were sampled at two times points (12000 ybp and 20208 ybp),  
240 which corresponds to macrofossil evidence (29) for the presence of *A. alpina* in  
241 Scandinavia and to inferred time of divergence between Central European population  
242 and Scandinavian population (Fig. 3A). Mutation rates and recombination rates were  
243 scaled to simulate genetic diversity close to the observed data. Thirteen samples were  
244 randomly drawn from the simulated Central European population and eight from the  
245 simulated Scandinavian population. Neutral diversity at 4-fold synonymous sites was  
246 recorded in each population at the two time points mentioned above. We note that in  
247 these simulations we used a linkage map based on accessions that were not from  
248 Scandinavia. It is possible that crossover rates could be higher in selfers (30), and if  
249 this were the case, we would expect to see a less pronounced effect of background  
250 selection on neutral diversity in selfing populations from Scandinavia. These  
251 simulations should thus be conservative with respect to assessing whether the  
252 reduction in diversity in Scandinavia can be explained by selfing and background  
253 selection alone, without a concomitant demographic change.

254 **Supplementary Results**

255

256 **ROH and decay of LD support mating system variation inferred using progeny**  
257 **array estimates of outcrossing rates**

258 Inbreeding increases homozygosity, resulting in longer blocks of contiguous  
259 homozygous genomic tracts, termed runs of homozygosity (ROH) (31). In the  
260 absence of additional confounding effects, we therefore expect lengths of ROHs to be  
261 highest for self-fertilizing populations, followed in turn by mixed-mating populations  
262 and outcrossing populations. We quantified ROH based on 474,250 SNPs pruned for  
263 LD, and found that in agreement with our expectation, highly self-fertilizing  
264 Scandinavian individuals have very long ROH, whereas mixed-mating French and  
265 Spanish individuals have intermediate and variable lengths of ROH, and outcrossing  
266 Greek individuals harbor few and typically short ROH (Fig. S1). Italian individuals  
267 show markedly longer ROH than Greek individuals. In good agreement with these  
268 results, LD decayed the fastest with physical distance in the Greek population,  
269 followed by the Italian, French and Spanish populations. In contrast, the Scandinavian  
270 populations exhibited high long-range LD (albeit with broad confidence intervals,  
271 likely as a result of the low number of SNPs available for analysis in this population)  
272 (Fig. S2). Given the evidence for functional self-incompatibility in the Italian  
273 population, the intermediate patterns of LD and ROH in this population suggests the  
274 action of additional factors that affect homozygosity beyond outcrossing rates, for  
275 instance biparental inbreeding or bottleneck events.

276 **Supplementary Tables**

277

278 **Table S1.** Geographical origin of all included samples and average coverage of  
279 resequencing data.

| <b>Sample ID</b> | <b>Country</b> | <b>Location</b>  | <b>Latitude</b> | <b>Longitude</b> | <b>Coverage</b> |
|------------------|----------------|------------------|-----------------|------------------|-----------------|
| <b>AaVikS1</b>   | Greece         | Vikos            | 39.9534         | 20.7043          | 32.6            |
| <b>AaVikS4</b>   | Greece         | Vikos            | 39.9534         | 20.7043          | 27.5            |
| <b>AaVikS6</b>   | Greece         | Vikos            | 39.9534         | 20.7043          | 27.7            |
| <b>AaVikS7</b>   | Greece         | Vikos            | 39.9534         | 20.7043          | 26.5            |
| <b>AaVikS8</b>   | Greece         | Vikos            | 39.9534         | 20.7043          | 27.0            |
| <b>523_I</b>     | Italy          | Apuan Alps       | 44.1300         | 10.2100          | 26.7            |
| <b>Aa157-11A</b> | Italy          | Apuan Alps       | 44.0788         | 10.3270          | 21.2            |
| <b>Aa157-3A</b>  | Italy          | Apuan Alps       | 44.0788         | 10.3270          | 22.9            |
| <b>Aa157-4A</b>  | Italy          | Apuan Alps       | 44.0788         | 10.3270          | 21.7            |
| <b>Aa157-7A</b>  | Italy          | Apuan Alps       | 44.0788         | 10.3270          | 21.6            |
| <b>222_A</b>     | France         | Pic Blanc        | 45.0641         | 6.3839           | 18.4            |
| <b>222_B</b>     | France         | Pic Blanc        | 45.0641         | 6.3839           | 45.1            |
| <b>222_C</b>     | France         | Pic Blanc        | 45.0641         | 6.3839           | 17.1            |
| <b>222_D</b>     | France         | Galibier         | 45.0605         | 6.4036           | 20.8            |
| <b>222_E</b>     | France         | Galibier         | 45.0605         | 6.4036           | 16.8            |
| <b>222_F</b>     | France         | Galibier         | 45.0605         | 6.4036           | 16.0            |
| <b>222_Q</b>     | France         | Galibier         | 45.0605         | 6.4036           | 15.6            |
| <b>222_N</b>     | France         | Granon           | 44.9663         | 6.5824           | 23.8            |
| <b>222_O</b>     | France         | Granon           | 44.9663         | 6.5825           | 15.6            |
| <b>222_P</b>     | France         | Granon           | 44.9663         | 6.5825           | 26.2            |
| <b>222_I</b>     | Spain          | Lago de la Cueva | 43.0515         | -6.1048          | 28.6            |
| <b>222_J</b>     | Spain          | Lago de la Cueva | 43.0515         | -6.1048          | 24.0            |
| <b>222_L</b>     | Spain          | Angliru          | 43.2298         | -5.9391          | 22.3            |
| <b>222_M</b>     | Spain          | Angliru          | 43.2298         | -5.9391          | 20.6            |
| <b>523_F</b>     | Spain          | Jaca Pyrenees    | 42.5500         | -0.5500          | 34.2            |
| <b>222_G</b>     | Sweden         | Geargevaggi      | 68.4136         | 18.3197          | 28.8            |
| <b>222_H</b>     | Sweden         | Geargevaggi      | 68.4136         | 18.3197          | 24.5            |
| <b>222_S</b>     | Sweden         | Nuolja           | 68.3608         | 18.7169          | 25.5            |
| <b>222_T</b>     | Sweden         | Nuolja           | 68.3608         | 18.7170          | 28.7            |
| <b>222_U</b>     | Norway         | Riasten          | 62.8344         | 11.7445          | 27.6            |
| <b>222_V</b>     | Norway         | Riasten          | 62.8344         | 11.7445          | 30.6            |
| <b>222_W</b>     | Sweden         | Tväråklumpen     | 63.2082         | 12.3499          | 28.5            |
| <b>222_X</b>     | Sweden         | Tväråklumpen     | 63.2082         | 12.3499          | 36.5            |
| <b>523_D</b>     | Iceland        | Sveinstindur     | 64.1000         | -18.3700         | 30.3            |
| <b>523_B</b>     | Poland         | Czarna Gora      | 49.4283         | 20.1242          | 25.0            |



|              |             |            |         |          |      |
|--------------|-------------|------------|---------|----------|------|
| <b>523_G</b> | Portugal    | Madeira    | 32.7608 | -17.1342 | 24.8 |
| <b>523_A</b> | Switzerland | Gornegrat  | 45.9836 | 7.7842   | 29.0 |
| <b>523_H</b> | Germany     | Wisent Tal | 49.7907 | 11.2741  | 43.3 |

280

281 **Table S2.** Population genetic summary statistics and confidence intervals (CI) based  
 282 on genomic resequencing of 38 samples of *A. alpina*. Estimates are shown for 0-fold  
 283 degenerate nonsynonymous sites, 4-fold degenerate synonymous sites, intergenic sites  
 284 in regions with low gene density and high recombination rates, and all sites.

| <b>Site type</b>                                                  | <b>Invariant</b> | <b>SNPs</b> | <b><math>\pi</math></b> | <b>CI <math>\pi</math></b> | <b>Tajima's D</b> | <b>CI Tajima's D</b> |
|-------------------------------------------------------------------|------------------|-------------|-------------------------|----------------------------|-------------------|----------------------|
| 0-fold                                                            | 5991447          | 98564       | 0.0027                  | (0.0003 -<br>0.0089)       | -0.70             | (-2.00 - 1.18)       |
| 4-fold                                                            | 1292547          | 65821       | 0.0102                  | (0.0007 -<br>0.0310)       | -0.14             | (-1.88 - 2.04)       |
| intergenic high-<br>recombination,<br>low gene density<br>regions | 2578961          | 95844       | 0.0061                  | (0.0020 -<br>0.0137)       | -0.71             | (-1.96 - 0.90)       |
| Total                                                             | 43209020         | 1514615     | 0.0058                  | (0.0018 -<br>0.0129)       | -0.66             | (-1.92 - 0.90)       |

285

286 **Table S3.** Pairwise  $F_{ST}$  estimates for regional populations of *A. alpina*.

| <b>Comparison</b>     | <b>mean <math>F_{ST}</math></b> | <b>median <math>F_{ST}</math></b> | <b>2.5%<br/>CI<br/>bound</b> | <b>97.5%<br/>CI<br/>bound</b> |
|-----------------------|---------------------------------|-----------------------------------|------------------------------|-------------------------------|
| France vs Scandinavia | 0.54                            | 0.56                              | 0.24                         | 0.78                          |
| Greece vs France      | 0.42                            | 0.42                              | 0.16                         | 0.69                          |
| Greece vs Italy       | 0.44                            | 0.42                              | 0.24                         | 0.70                          |
| Greece vs Spain       | 0.46                            | 0.46                              | 0.21                         | 0.73                          |
| Greece vs Scandinavia | 0.73                            | 0.75                              | 0.52                         | 0.89                          |
| Italy vs France       | 0.46                            | 0.46                              | 0.19                         | 0.74                          |
| Italy vs Spain        | 0.49                            | 0.48                              | 0.23                         | 0.76                          |
| Italy vs Scandinavia  | 0.82                            | 0.83                              | 0.66                         | 0.95                          |
| Spain vs France       | 0.39                            | 0.38                              | 0.14                         | 0.72                          |
| Spain vs Scandinavia  | 0.81                            | 0.82                              | 0.61                         | 0.96                          |

287

288 **Table S4.** Population genetic summary statistics (sd = standard deviation) for each  
 289 regional population. Invariant sites, segregating sites (S), nucleotide diversity ( $\pi$ ) and  
 290 Tajima's D are reported.

| <b>Regional population (n)</b> | <b>Site type</b>                    | <b>Invariant</b> | <b>S</b> | <b><math>\pi</math> (sd)</b> | <b>Tajima's D (sd)</b> |
|--------------------------------|-------------------------------------|------------------|----------|------------------------------|------------------------|
| Greece (5)                     | 0-fold                              | 6233152          | 41026    | 0.0022<br>(0.00214)          | -0.35 (0.79)           |
|                                | 4-fold                              | 1381058          | 30920    | 0.00803<br>(0.00761)         | -0.09 (0.85)           |
|                                | intron                              | 11012738         | 180847   | 0.0056<br>(0.00379)          | -0.26 (0.73)           |
|                                | neutral interg.                     | 1740608          | 27968    | 0.00545<br>(0.00325)         | -0.28 (0.65)           |
|                                | Total                               | 47255711         | 669349   | 0.00481<br>(0.00275)         | -0.24 (0.59)           |
| Italy (5)                      | 0-fold                              | 6248282          | 23135    | 0.00151<br>(0.00162)         | 0.57 (0.88)            |
|                                | 4-fold                              | 1392110          | 17971    | 0.00537<br>(0.00582)         | 0.59 (0.89)            |
|                                | intron                              | 11091311         | 99431    | 0.00369<br>(0.00286)         | 0.75 (0.83)            |
|                                | interg. high rec. high gene density | 1752304          | 14752    | 0.00339<br>(0.00234)         | 0.71 (0.69)            |
|                                | Total                               | 47533084         | 367729   | 0.00312<br>(0.00195)         | 0.8 (0.76)             |
| Spain (5)                      | 0-fold                              | 6251401          | 21233    | 0.00135<br>(0.00151)         | 0.42 (0.73)            |
|                                | 4-fold                              | 1394351          | 15852    | 0.00463<br>(0.00559)         | 0.49 (0.78)            |
|                                | intron                              | 11118215         | 88697    | 0.00323<br>(0.00286)         | 0.49 (0.68)            |
|                                | interg. high rec. high gene density | 1757114          | 13471    | 0.00301<br>(0.00222)         | 0.49 (0.63)            |
|                                | Total                               | 47627475         | 334827   | 0.00279<br>(0.00194)         | 0.52 (0.58)            |
| France (10)                    | 0-fold                              | 6231797          | 24189    | 0.00144<br>(0.00162)         | 0.85 (0.95)            |
|                                | 4-fold                              | 1378448          | 19661    | 0.00522<br>(0.00586)         | 0.83 (1.02)            |
|                                | intron                              | 11058404         | 107087   | 0.00363<br>(0.00288)         | 1.16 (0.93)            |
|                                | interg. high rec. high gene density | 1747360          | 15238    | 0.00324<br>(0.00254)         | 1.1 (0.86)             |

|                    |                                              |          |        |                      |              |
|--------------------|----------------------------------------------|----------|--------|----------------------|--------------|
|                    | Total                                        | 47375073 | 395597 | 0.00309<br>(0.00203) | 1.21 (0.85)  |
| Scandinavia<br>(8) | 0-fold                                       | 6271581  | 1151   | 0.00007<br>(0.00034) | 0.07 (1.19)  |
|                    | 4-fold                                       | 1410199  | 589    | 0.00017<br>(0.00099) | 0.22 (1.32)  |
|                    | intron                                       | 11192785 | 3898   | 0.00011<br>(0.00037) | -0.14 (1.16) |
|                    | interg.<br>high rec.<br>high gene<br>density | 1767719  | 599    | 0.00013<br>(0.00046) | -0.07 (1.23) |
|                    | Total                                        | 47910901 | 15632  | 0.00012<br>(0.00038) | -0.1 (1.17)  |

---

291

292 **Table S5.** Number of invariant sites, segregating sites and sites fixed for the derived  
 293 allele based on an outgroup (*A. montbretiana*) in each population for 4-fold  
 294 synonymous, 0-fold-synonymous and major effect mutations. A. Counts after  
 295 removing all missing data in any individual and in any population. B. Counts for the  
 296 full data set.

297  
 298 **A.**

|                               | <b>Greece</b> | <b>Italy</b> | <b>Spain</b> | <b>France</b> | <b>Scandinavia</b> |
|-------------------------------|---------------|--------------|--------------|---------------|--------------------|
| <b>4-fold</b>                 |               |              |              |               |                    |
| Fixed ancestral               | 8711          | 11513        | 12878        | 10673         | 13865              |
| Segregating                   | 8144          | 4706         | 4036         | 6197          | 136                |
| Fixed derived                 | 2956          | 3592         | 2897         | 2941          | 5810               |
| <b>0-fold</b>                 |               |              |              |               |                    |
| Fixed ancestral               | 15770         | 19700        | 21468        | 19093         | 23231              |
| Segregating                   | 11290         | 6536         | 5686         | 7900          | 328                |
| Fixed derived                 | 4374          | 5198         | 4280         | 4441          | 7875               |
| <b>Major effect mutations</b> |               |              |              |               |                    |
| Fixed ancestral               | 268           | 304          | 330          | 310           | 357                |
| Segregating                   | 128           | 90           | 68           | 91            | 10                 |
| Fixed derived                 | 43            | 45           | 41           | 38            | 72                 |

299  
 300 **B.**

|                               | <b>Greece</b> | <b>Italy</b> | <b>Spain</b> | <b>France</b> | <b>Scandinavia</b> |
|-------------------------------|---------------|--------------|--------------|---------------|--------------------|
| <b>4-fold</b>                 |               |              |              |               |                    |
| Fixed ancestral               | 26197         | 30652        | 33374        | 12070         | 39754              |
| Segregating                   | 23964         | 12623        | 10771        | 7151          | 449                |
| Fixed derived                 | 8758          | 9488         | 7328         | 3348          | 16563              |
| <b>0-fold</b>                 |               |              |              |               |                    |
| Fixed ancestral               | 43318         | 49144        | 52265        | 21848         | 61956              |
| Segregating                   | 30870         | 15946        | 14321        | 9013          | 879                |
| Fixed derived                 | 12104         | 12872        | 10407        | 5084          | 21339              |
| <b>Major effect mutations</b> |               |              |              |               |                    |
| Fixed ancestral               | 593           | 650          | 699          | 357           | 789                |
| Segregating                   | 304           | 187          | 136          | 99            | 21                 |
| Fixed derived                 | 79            | 84           | 84           | 46            | 170                |

301 **Table S6.** Estimated parameters and model fit for three demographic models of the split between Central European and Scandinavian *A. alpina*.  
302 The preferred model (Akaike weight 0.924) has a population split followed by a bottleneck, and no subsequent migration. The model with  
303 migration has unlimited bidirectional migration for 2000 generations following the population split. All estimated times are given in years before  
304 present (ybp), assuming a generation time of 1.5 years. Maximum likelihood estimates are shown, with 95% confidence intervals in parentheses.  
305

| Model        | $N_{\text{Central Europe}}^1$ | $N_{\text{Scandinavia}}^2$ | $N_{\text{BOT}}^3$ | $T_{\text{DIV}}^4$ | $T_{\text{BOT}}^5$ | Mig <sub>CE</sub> <sup>6</sup> | Mig <sub>SC</sub> <sup>6</sup> | AIC<br>(w) <sup>7</sup> |
|--------------|-------------------------------|----------------------------|--------------------|--------------------|--------------------|--------------------------------|--------------------------------|-------------------------|
| Split +      | 128691                        | 9660                       | 9218               | 20208              | 2697               | NA                             | NA                             | 98506                   |
| Bottleneck   | (122774 -<br>134202)          | (8685 -<br>11790)          | (6633 -<br>11115)  | (18999 -<br>24218) | (509 -<br>22188)   |                                |                                | (0.924)                 |
| Split        | 136092                        | 27771                      | NA                 | 59288              | NA                 | NA                             | NA                             | 100387                  |
|              | (128513 -<br>144295)          | (23932 -<br>29928)         |                    | (56993 -<br>65093) |                    |                                |                                | (0)                     |
| Split +      | 127391                        | 10331                      | 9887               | 52236              | 22108              | 3.13E-11                       | 4.70E-13                       | 98511                   |
| Bottleneck + | (122316 -<br>134315)          | (8528 -<br>11109)          | (7094 -<br>10270)  | (45627 -<br>58140) | (10591 -<br>54262) | (2.23E-13 -<br>6.95E-7)        | (3.76E-14 -<br>3.10E-8)        | (0.076)                 |

306  
307 <sup>1</sup> Effective population size estimate for our scattered sample of Central European *A. alpina*.  
308 <sup>2</sup> Effective population size estimate for Scandinavian *A. alpina*.  
309 <sup>3</sup> Effective population size for duration of bottleneck.  
310 <sup>4</sup> Population split time.  
311 <sup>5</sup> Bottleneck end.  
312 <sup>6</sup> Migration rate, Mig<sub>CE</sub> corresponds to probability that a Central European individual originates from Scandinavia and Mig<sub>SC</sub> to the probability  
313 that a Scandinavian individual originates in Central Europe.  
314 <sup>7</sup> Akaike information criterion, weight

315 **Table S7.** Results of DFE-alpha analysis of selection on 0-fold non-synonymous mutations. Analyses assumed a two epoch demographic model  
316 for each regional population.  $b$  and  $N_{es}$  correspond to the shape and mean of the gamma distribution used to model the DFE. The proportion of  
317 sites under increasing level of purifying selection is shown in bins of  $N_{es}$ , from nearly neutral ( $N_{es}$  0-1), through mildly deleterious ( $N_{es}$  1-10) to  
318 highly deleterious ( $N_{es} > 10$ ).  
319

| <b>Regional population</b> | <b><math>b</math></b> | <b><math>N_{es}</math></b>       | <b><math>N_{es}</math> 0-1</b> | <b><math>N_{es}</math> 1 - 10</b> | <b><math>N_{es} &gt; 10</math></b> |
|----------------------------|-----------------------|----------------------------------|--------------------------------|-----------------------------------|------------------------------------|
| Greece                     | 0.26 (0.21, 0.30)     | -1.26E+2 (-4.06E+02, -8.76E+01)  | 0.22 (0.2, 0.24)               | 0.18 (0.15, 0.21)                 | 0.60 (0.58, 0.62)                  |
| Italy                      | 0.13 (0.05, 0.37)     | -8.00E+3 (-2.62E+10, -5.85E+01)  | 0.25 (0.17, 0.28)              | 0.09 (0.03, 0.24)                 | 0.66 (0.57, 0.71)                  |
| Spain                      | 0.15 (0.06, 0.27)     | -1.39E+3 (-7.83E+07, -9.44E+01)  | 0.24 (0.21, 0.28)              | 0.10 (0.04, 0.18)                 | 0.66 (0.59, 0.68)                  |
| France                     | 0.05 (0.05, 0.14)     | -1.89E+10 (-5.23E+10, -7.20E+03) | 0.27 (0.24, 0.28)              | 0.03 (0.03, 0.09)                 | 0.69 (0.66, 0.71)                  |
| Scandinavia                | 0.42 (0.05, 99.99)    | -1.24E+1 (-6.43E+06, -2.09E+00)  | 0.30 (0, 0.51)                 | 0.40 (0.05, 1)                    | 0.30 (0, 0.55)                     |



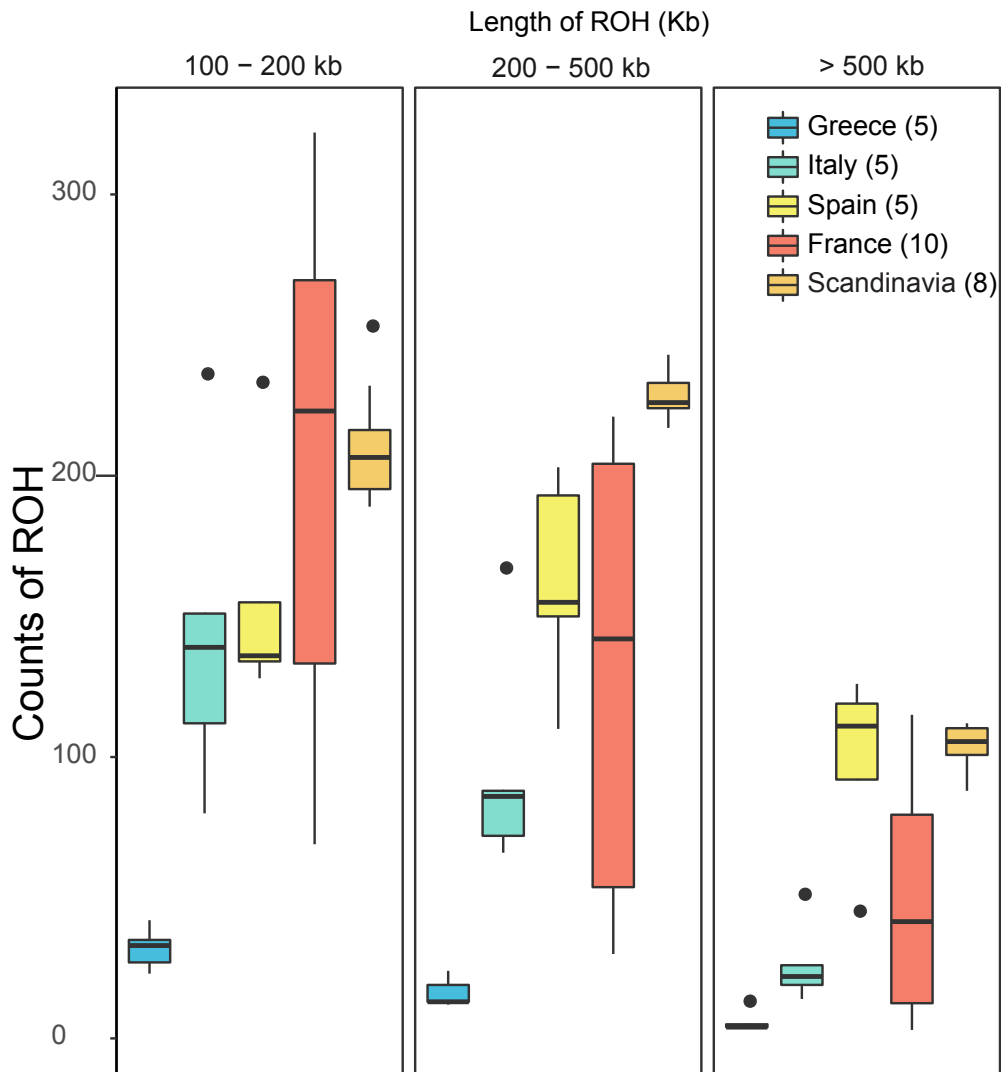

323  
324 Figure S1. The number of runs of homozygosity (ROH) differs among regional  
325 populations with different mating systems. ROH were binned into small (100 –  
326 200kb), medium (200 – 500kb) and large (>500kb) runs. Self-incompatible Greek  
327 individuals have the shortest ROH, followed by self-incompatible Italian individuals,  
328 mixed-mating Spanish individuals, and the longest ROH are found in highly self-  
329 fertilizing Scandinavian individuals. Individuals in the French cluster show highly  
330 variable lengths of ROH. Thick bars are the median count, box edges the interquartile  
331 and whiskers represent 1.5 times the interquartile range. For each regional population,  
332 the sample size is shown in parentheses in the figure legend.  
333

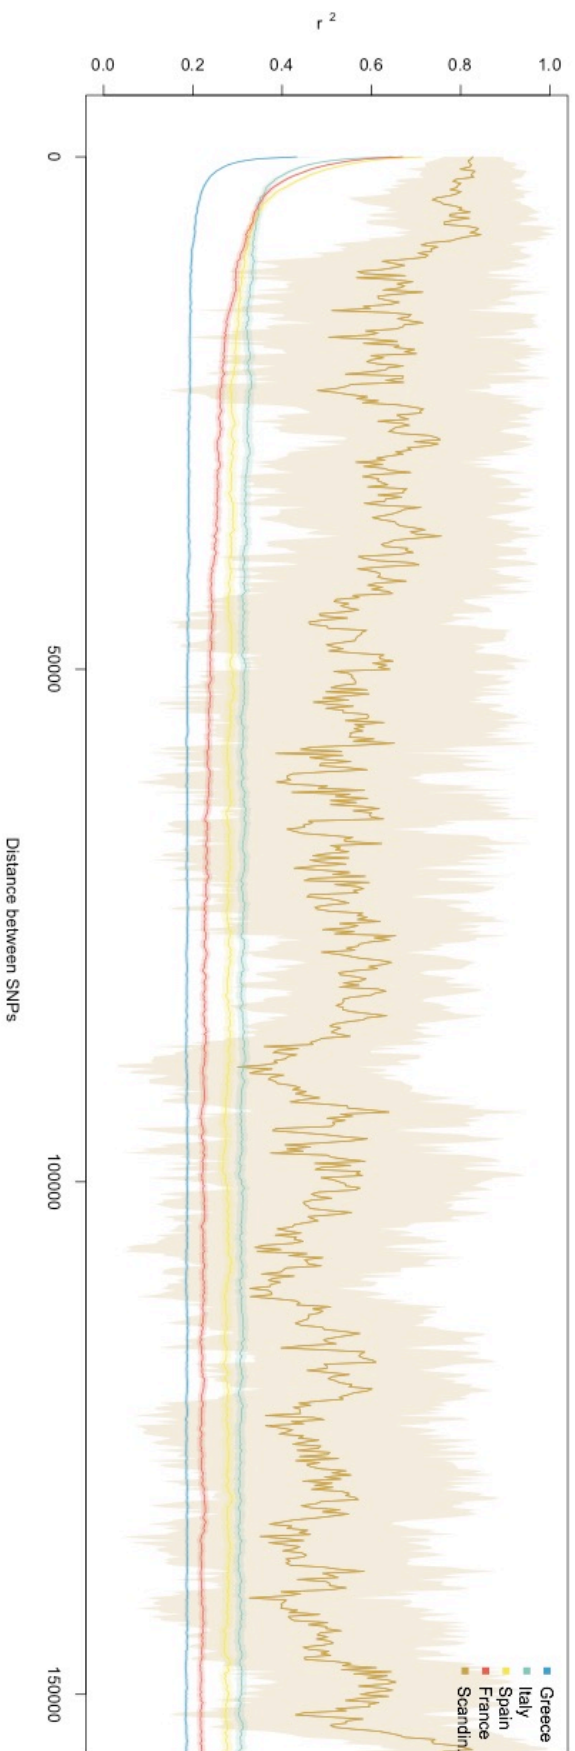

334  
 335 Figure S2. Decay of linkage disequilibrium ( $r^2$ ) with physical distance for each regional population of *A. alpina*.  
 336

337  
338

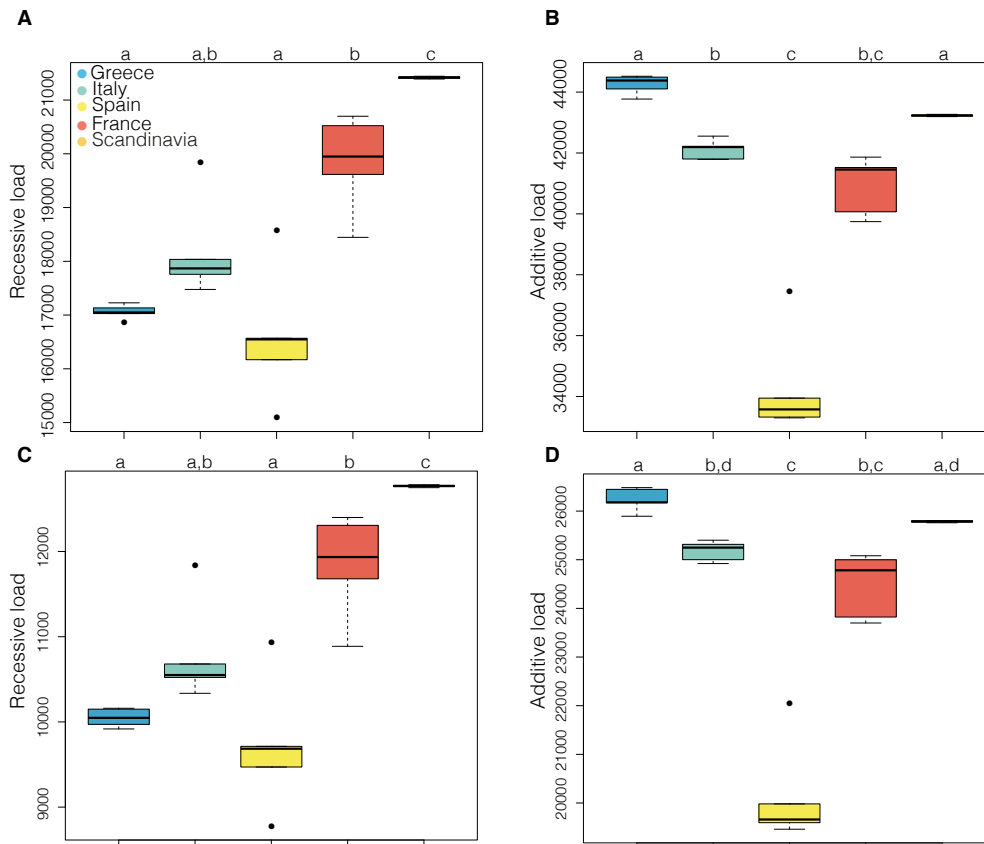

339  
340 Figure S3. Genetic load estimates for outcrossing, mixed-mating and highly selfing *A.*  
341 *alpina* regional populations based on derived nonsynonymous alleles (A and B) and  
342 strongly constrained derived nonsynonymous alleles (C and D). Lowercase letters  
343 indicate groups with statistically significant differences ( $P < 0.05$ ) based on a Kruskal-  
344 Wallis test followed by post-hoc Dunn test. A. The recessive genetic load (number of  
345 derived homozygous genotypes) for 0-fold nonsynonymous variants. B. The additive  
346 genetic load (number of derived alleles) for 0-fold nonsynonymous variants. C. The  
347 recessive genetic load for 0-fold nonsynonymous variants at highly constrained sites,  
348 defined as those with Phastcons score  $> 0.9$  based on an analysis of nine Brassicaceae  
349 species. D. The additive genetic load for 0-fold nonsynonymous variants at highly  
350 constrained sites.

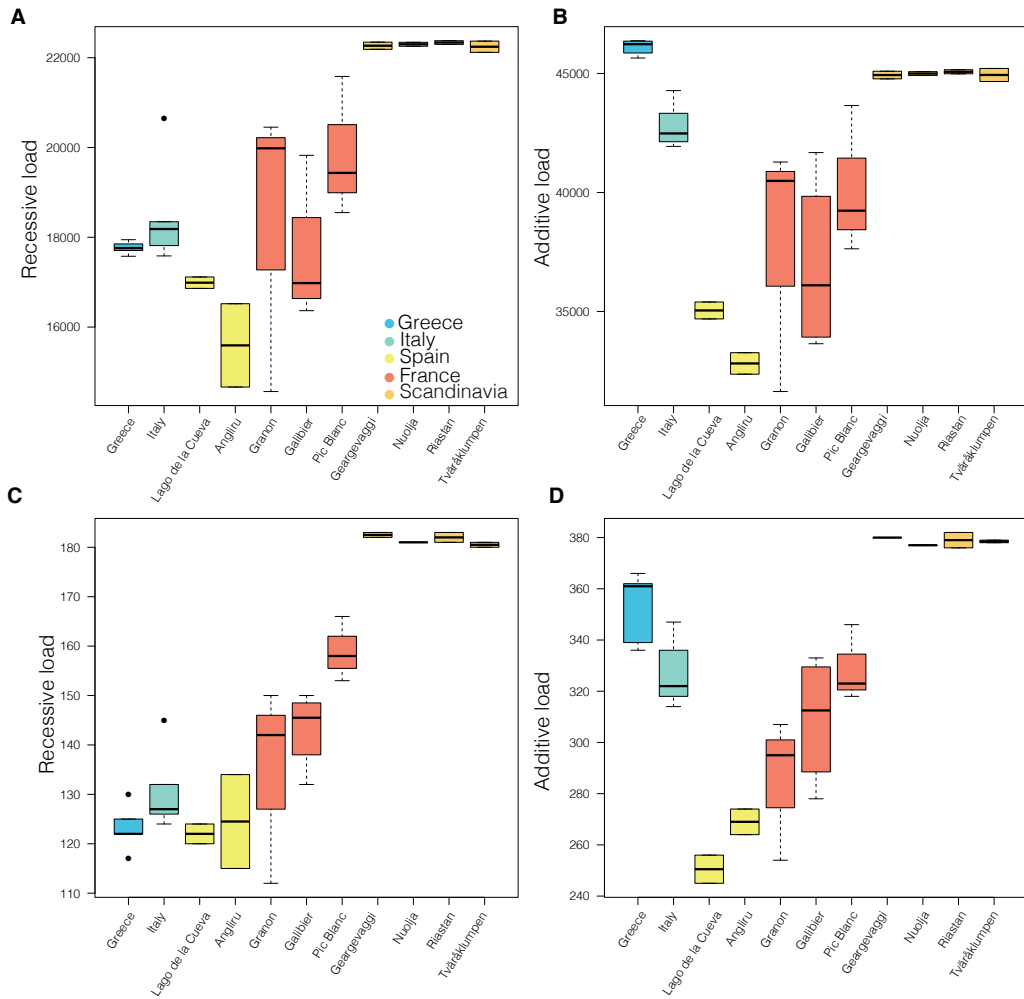

351  
 352 Figure S4. Genetic load estimates for outcrossing, mixed-mating and highly selfing *A.*  
 353 *alpina* geographical populations based on derived 0-fold nonsynonymous alleles (A  
 354 and B) and derived major-effect alleles (C and D). A and C show the recessive load  
 355 (number of derived homozygous genotypes) whereas B and D show the additive  
 356 genetic load (number of derived alleles).  
 357

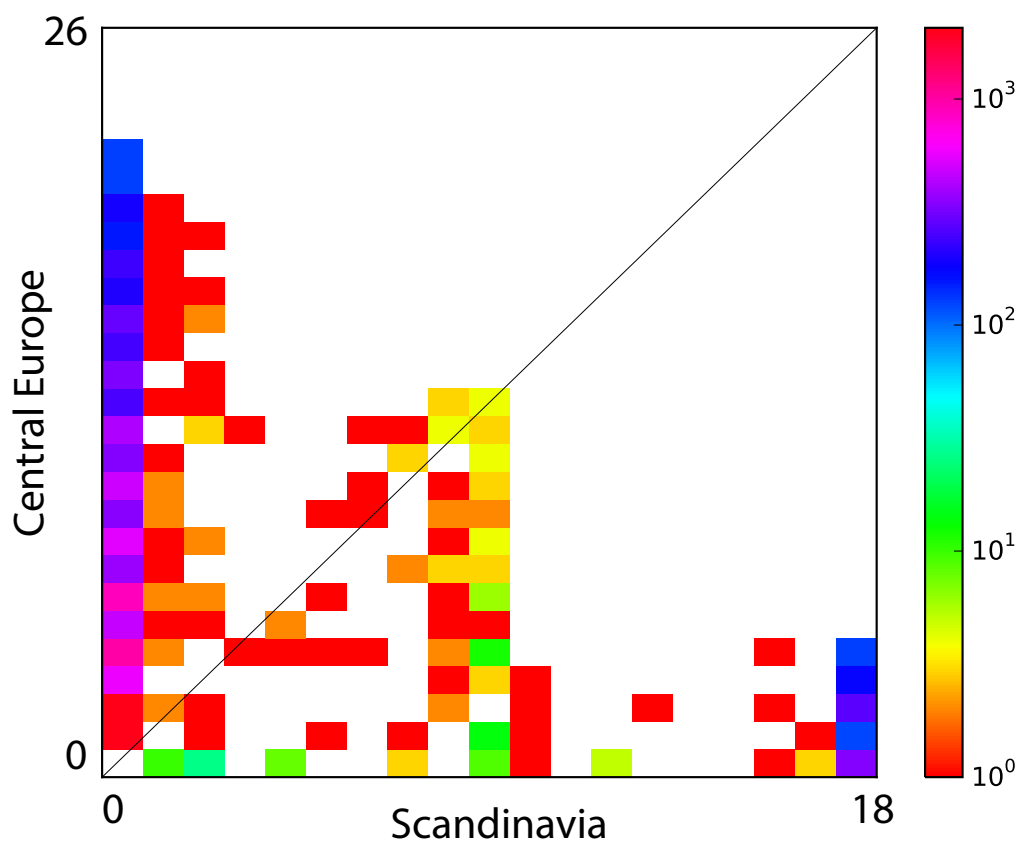

358  
 359  
 360  
 361

Figure S5. Joint site frequency spectrum for Scandinavian and Central European *A. alpina*.

362  
363

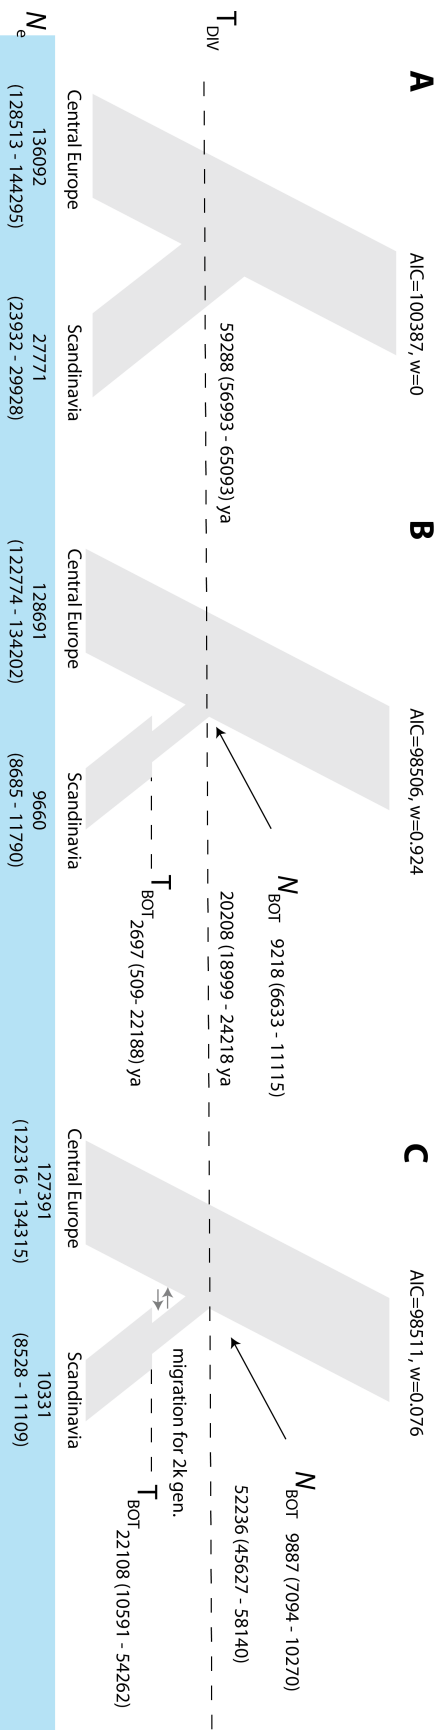

364 Figure S6. Three demographic models used to estimate divergence time and population size of the Scandinavian population of *A. alpina*. The  
365 model depicted in panel B is preferred based on AIC. Full parameter estimates are also shown in Table S6.  
366

367

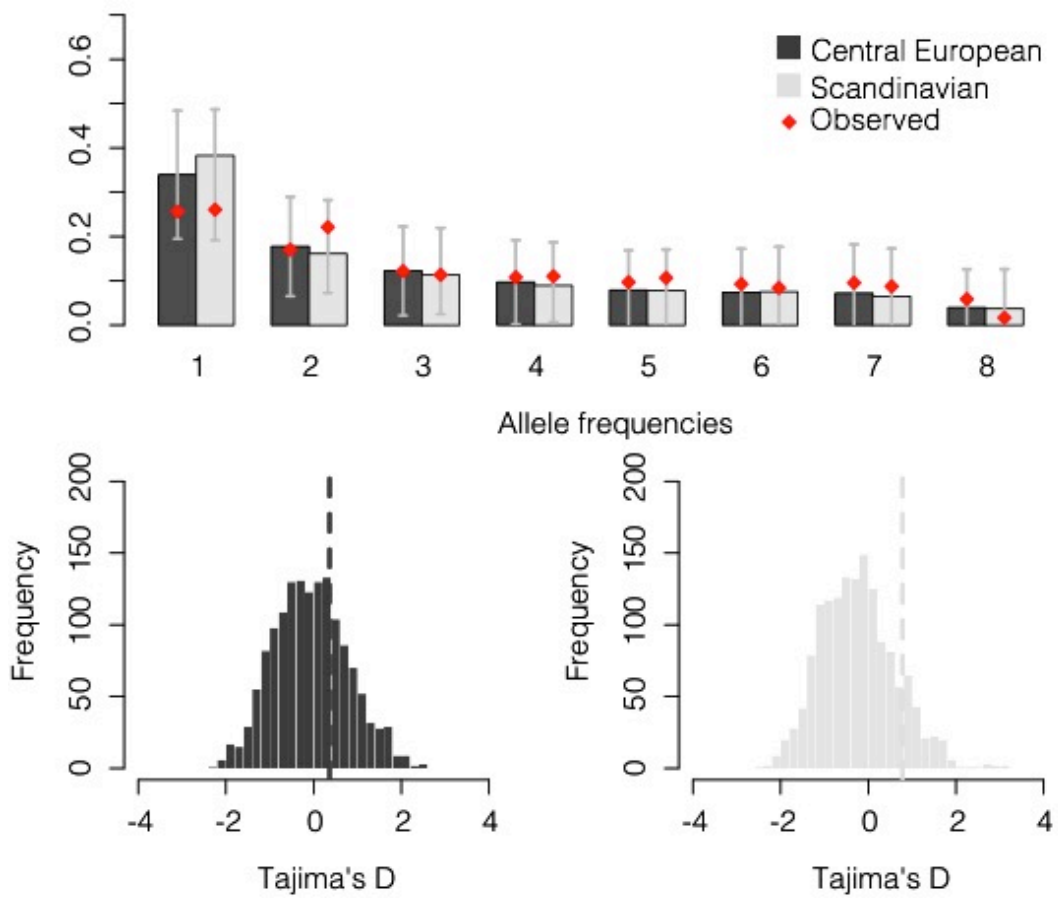

368  
369  
370  
371  
372  
373  
374  
375  
376

Figure S7. Folded site frequency spectra (SFS) and Tajima's D values derived from 1000 coalescent simulations under the best-fit demographic model compared to the observed SFS (red diamonds) and Tajima's D (dashed lines) for the Scandinavian and the Central European populations. Barplots and error bars correspond respectively to the average SFS and the standard deviation over the simulations. Note that the SFS have been downsampled to the same sample size to facilitate comparison.

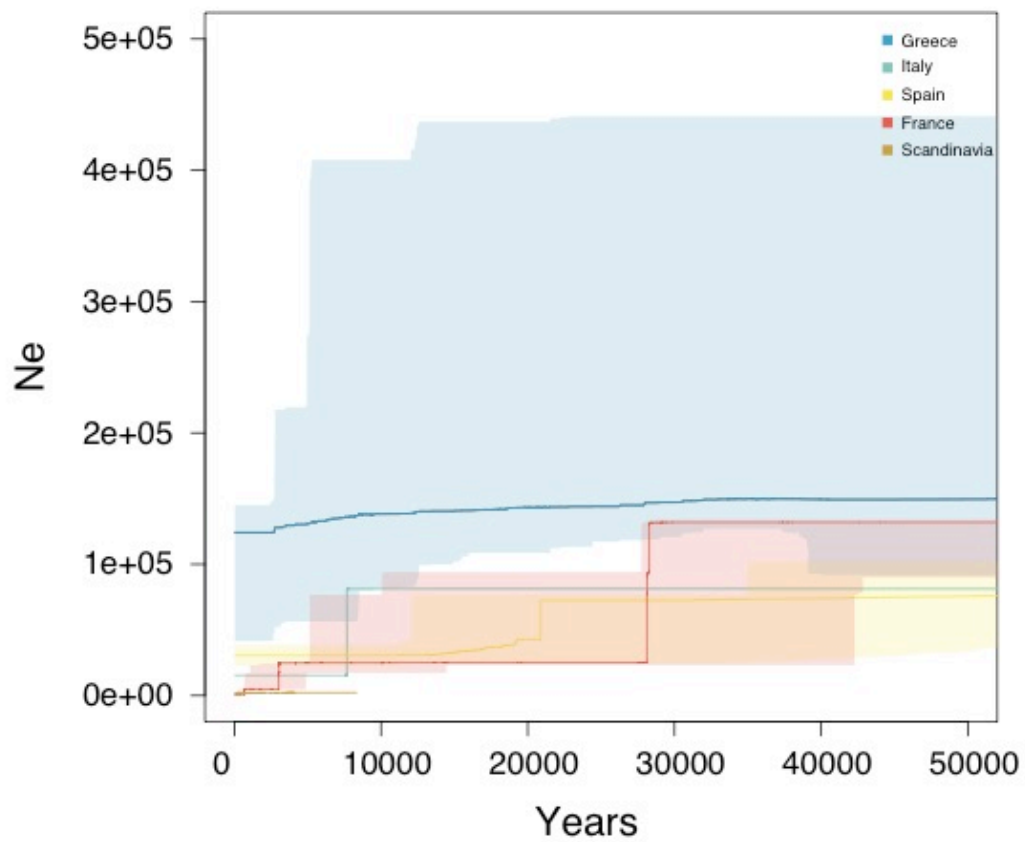

377  
 378 Figure S8. Recent population history inferred using stairway plot analyses. Lines  
 379 correspond to best-fit estimates of  $N_e$  for each regional population whereas shaded  
 380 areas indicate 95% confidence intervals.



381

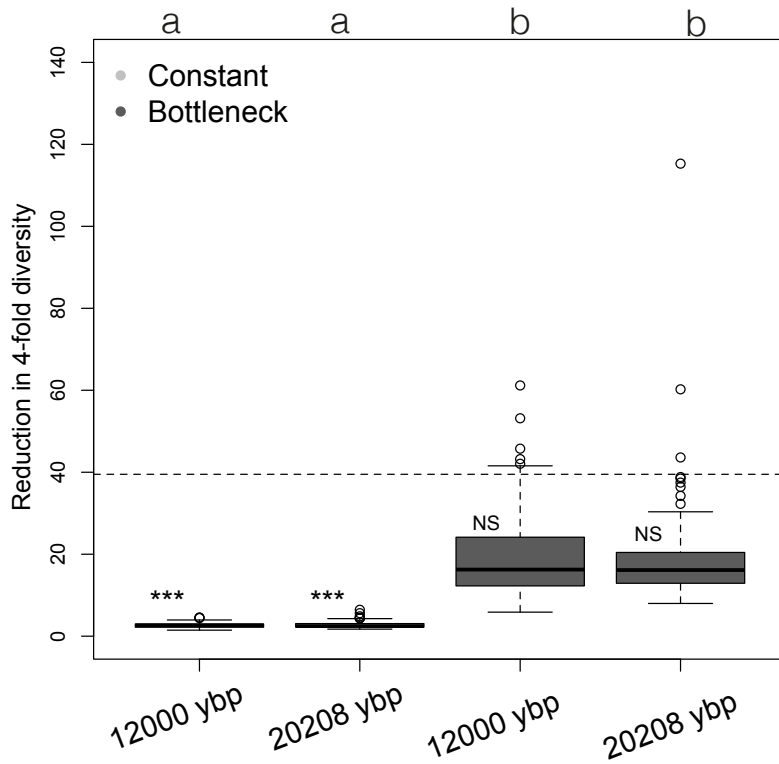

382

383

384 Figure S9. Results of forward simulations using the DFE derived from the Central  
385 European population. The boxplots show the ratio of synonymous polymorphism  
386 between an outcrossing population and a 90% selfing population experiencing either a  
387 constant population size or a 10-fold bottleneck, with the two populations diverging  
388 either 12,000 ybp or 20,208 ybp. The dashed line indicates the observed ratio of  
389 synonymous polymorphism in Central Europe to that in Scandinavia. Letters indicate  
390 significant difference between models (Mann-Whitney test  $P < 0.001$ ). Asterisks  
391 indicate an observed neutral diversity reduction significantly greater than that  
392 expected, based on 300 simulations.

393

394

395 **References**

- 396 1. Martin M (2011) Cutadapt removes adapter sequences from high-throughput  
 397 sequencing reads. *EMBnet. journal* 17(1):pp. 10-12.
- 398 2. Bolger AM, Lohse M, & Usadel B (2014) Trimmomatic: a flexible trimmer  
 399 for Illumina sequence data. *Bioinformatics* 30(15):2114-2120.
- 400 3. Li H (2013) Aligning sequence reads, clone sequences and assembly contigs  
 401 with BWA-MEM. *arXiv:1303.3997*.
- 402 4. McKenna A, *et al.* (2010) The Genome Analysis Toolkit: a MapReduce  
 403 framework for analyzing next-generation DNA sequencing data. *Genome Res*  
 404 20(9):1297-1303.
- 405 5. Willing EM, *et al.* (2015) Genome expansion of *Arabis alpina* linked with  
 406 retrotransposition and reduced symmetric DNA methylation. *Nat Plants*  
 407 1:14023.
- 408 6. Smit AF, Hubley R, & Green P (1996) RepeatMasker Open-3.0.
- 409 7. Purcell S, *et al.* (2007) PLINK: a tool set for whole-genome association and  
 410 population-based linkage analyses. *Am J Hum Genet* 81(3):559-575.
- 411 8. Raj A, Stephens M, & Pritchard JK (2014) fastSTRUCTURE: variational  
 412 inference of population structure in large SNP data sets. *Genetics* 197(2):573-  
 413 589.
- 414 9. Caye K, Deist TM, Martins H, Michel O, & Francois O (2016) TESS3: fast  
 415 inference of spatial population structure and genome scans for selection. *Mol*  
 416 *Ecol Resour* 16(2):540-548.
- 417 10. Francis RM (2017) pophelper: an R package and web app to analyse and  
 418 visualize population structure. *Mol Ecol Resour* 17(1):27-32.
- 419 11. Weir BS, Cockerham CC. 1984. Estimating F-statistics for the analysis of  
 420 population structure. *Evolution* 6: 1358-1370.
- 421 12. Danecek P, Auton A, Abecasis G, Albers CA, Banks E, DePristo MA,  
 422 Handsaker RE, Lunter G, Marth GT, Sherry ST, McVean G, Durbin R, 1000  
 423 Genomes Project Analysis Group. 2011. The variant call format and  
 424 VCFtools. *Bioinformatics* 27:2156-2158.
- 425 13. Toräng, P., L. Vikström, J. Wunder, S. Wötzel, G. Coupland, and J. Ågren.  
 426 2017. Evolution of the selfing syndrome: Anther orientation and herkogamy  
 427 together determine reproductive assurance in a self-compatible plant.  
 428 *Evolution* 71:2206–2218..
- 429 14. Howrigan DP, Simonson MA, & Keller MC (2011) Detecting autozygosity  
 430 through runs of homozygosity: a comparison of three autozygosity detection  
 431 15. Steige KA, Laenen B, Reimegard J, Scofield DG, & Slotte T (2017) Genomic  
 432 analysis reveals major determinants of *cis*-regulatory variation in *Capsella*  
 433 *grandiflora*. *Proc Natl Acad Sci USA* 114(5):1087-1092.15.
- 434 16. Keightley PD & Eyre-Walker A (2007) Joint inference of the distribution of  
 435 fitness effects of deleterious mutations and population demography based on  
 436 nucleotide polymorphism frequencies. *Genetics* 177(4):2251-2261.
- 437 17. Cingolani P, *et al.* (2012) A program for annotating and predicting the effects  
 438 of single nucleotide polymorphisms, SnpEff: SNPs in the genome of  
 439 *Drosophila melanogaster* strain w1118; iso-2; iso-3. *Fly (Austin)* 6(2):80-92.
- 440 18. Harris RS (2007) *Improved pairwise alignment of genomic DNA* (ProQuest).
- 441 19. Henn BM, *et al.* (2016) Distance from sub-Saharan Africa predicts mutational  
 442 load in diverse human genomes. *Proc Natl Acad Sci USA* 113(4):E440-449.
- 443 20. Siepel A, Bejerano G, Pedersen JS, Hinrichs AS, Hou M, Rosenbloom K,  
 444 Clawson H, Spieth J, Hillier LW, Richards S, Weinstock GM, Wilson RK,

- 445 Gibbs RA, Kent WJ, Miller W, Haussler D 2005 Evolutionarily conserved  
446 elements in vertebrate, insect, worm, and yeast genomes. (2005) *Genome Res*  
447 15(8):1034–1050.
- 448 21. Haudry A, Platts AE, Vello E, Hoen DR, Leclercq M, Williamson RJ, Forczek  
449 E, Joly-Lopez Z, Steffen JG, Hazzouri KM, Dewar K, Stichcombe JR, Schoen  
450 DJ, Wang X, Schmutz J, Town CD, Edger PP, Pires JC, Schumaker KS, Jarvis  
451 DE, Mandakova T, Lysak MA, van den Bergh E, Schranz ME, Harrison PM,  
452 Moses AM, Bureau TE, Wright SI, Blanchette M (2013) An atlas of over  
453 90,000 conserved noncoding sequences provide insight into crucifer  
454 regulatory regions *Nat Genet* 45(8):891-898.
- 455 22. Excoffier L, Dupanloup I, Huerta-Sanchez E, Sousa VC, & Foll M (2013)  
456 Robust demographic inference from genomic and SNP data. *Plos Genet*  
457 9(10):e1003905.
- 458 23. Ossowski S, *et al.* (2010) The rate and molecular spectrum of spontaneous  
459 mutations in *Arabidopsis thaliana*. *Science* 327(5961):92-94.
- 460 24. Andrello M, de Villemereuil P, Busson D, Gaggiotti OE, Till-Bottraud I  
461 (2016) Population dynamics of *Arabis alpina* in the French Alps: evidence for  
462 demographic compensation? bioRxiv doi: <https://doi.org/10.1101/070847>
- 463 25. Johnson JB & Omland KS (2004) Model selection in ecology and evolution.  
464 *Trends Ecol Evol* 19(2):101-108.
- 465 26. Liu X, Fu Y-X (2015) Exploring population size changes using SNP  
466 frequency spectra. *Nat Genet* 47(5):555-559.
- 467 27. Haller BC & Messer PW (2017) SLiM 2: Flexible, Interactive Forward  
468 Genetic Simulations. *Mol Biol Evol* 34(1):230-240.
- 469 28. Jiao W-B, et al. (2017) Improving and correcting the contiguity of long-read  
470 genome assemblies of three plant species using optical mapping and  
471 chromosome conformation capture data. *Genome Res.* 27.5 (2017): 778-786.
- 472 29. Ehrlich D, *et al.* (2007) Genetic consequences of Pleistocene range shifts:  
473 contrast between the Arctic, the Alps and the East African mountains. *Mol*  
474 *Ecol* 16(12):2542-2559.
- 475 30. Wright SI, Ness RW, Foxe JP, Barrett SCH. 2008. Genomic consequences of  
476 outcrossing and selfing in plants. *Int J Plant Sci* 169(1):105-118.
- 477 31. Gibson J, Morton NE, & Collins A (2006) Extended tracts of homozygosity in  
478 outbred human populations. *Hum Mol Genet* 15(5):789-795.
